# Supplementary material for: Quantitative determination and subcellular mapping of Pt-based drugs in single breast tumour cells via laser ablation-ICP-mass spectrometry
Source: Royal Society of Chemistry journal article supplement (doi:10.1039/d4dt02467b), 2024-01-01
Supplement: d4dt02467b1.pdf [file d4dt02467b1.pdf]

## Supporting Information

### Quantitative determination and subcellular mapping of Pt-based drugs in single breast tumour cells via Laser Ablation – ICP-Mass Spectrometry

Legna Colina-Vegas, Thibaut Van Acker, Wilmer Villarreal, Olivier De Wever, Alzir Azevedo Batista, Joaquim de Araújo Nóbrega and Frank Vanhaecke\*

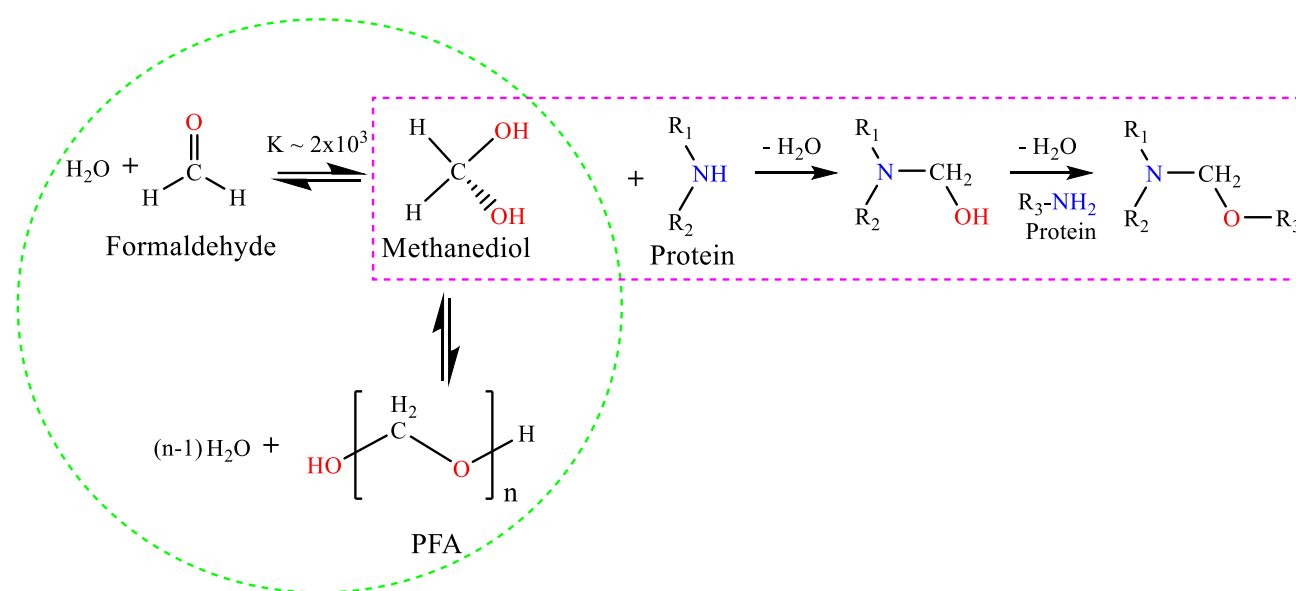

Scheme S1. Equilibrium of aqua-formaldehyde (---). Cross-linking reaction of proteins (---).

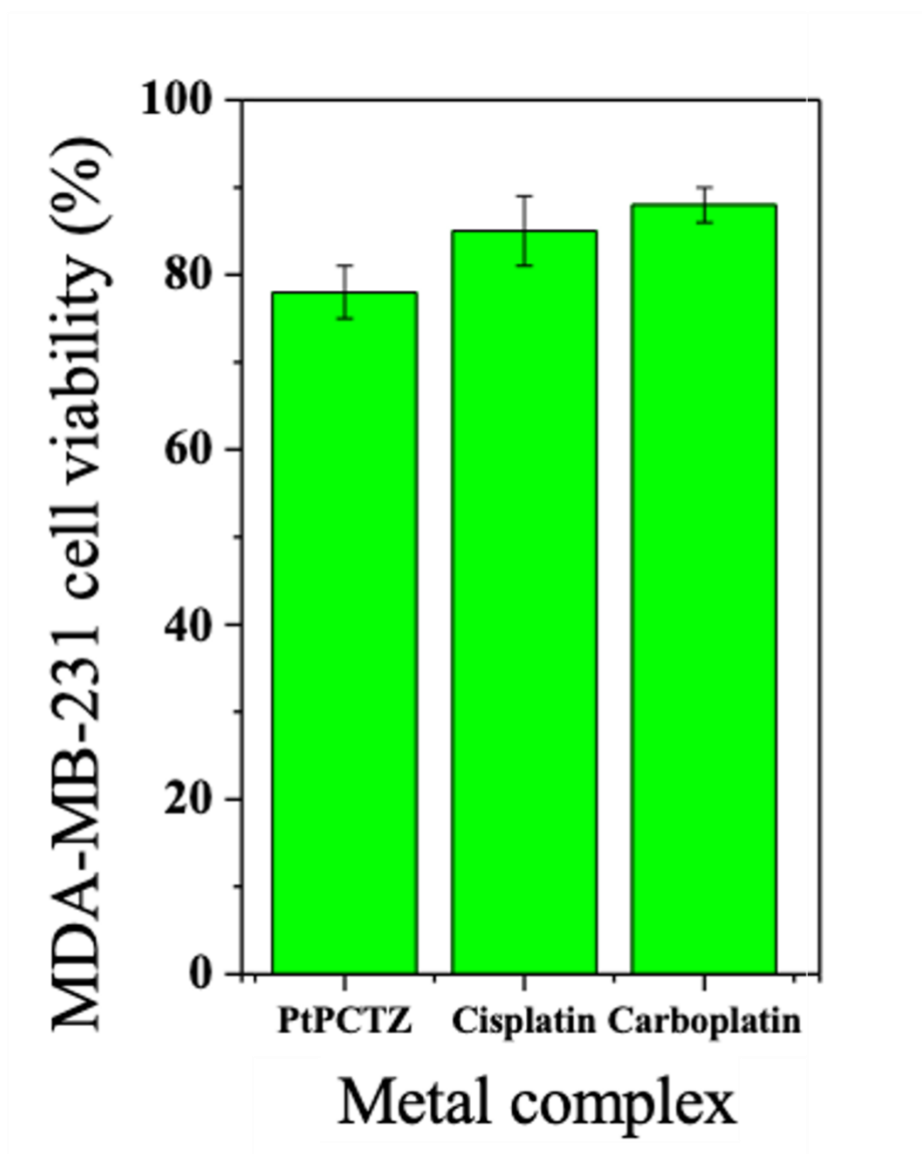

Figure S1 . Cell viability of MDA-MB-231 cells after incubation with Pt-based complexes for 24 h.

## Control

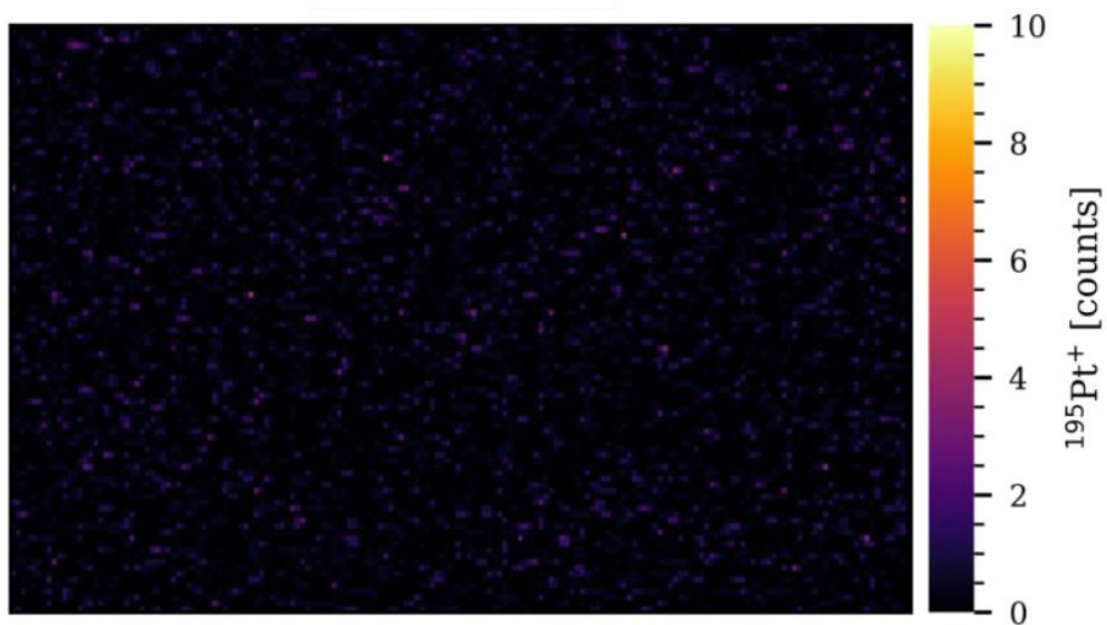

Figure S2. LA-ICP-MS map displaying the  $^{195}\text{Pt}^+$  signal intensity within single TNBC MDA-MB-231 control cells

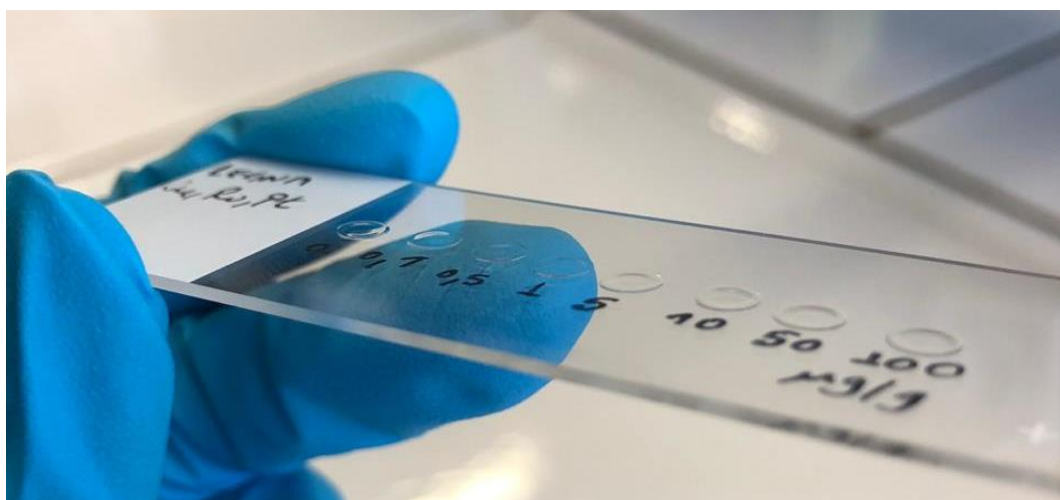

Figure S3. Gelatin droplet standards deposited on a glass microscope slide.
